# Supplementary material for: A distinct epigenetic profile distinguishes stenotic from non-inflamed fibroblasts in the ileal mucosa of Crohn’s disease patients
Source: PubMed Central journal article supplement (PMC6307755; doi:10.1371/journal.pone.0209656), 2018-12-27

# (A) WNT2B

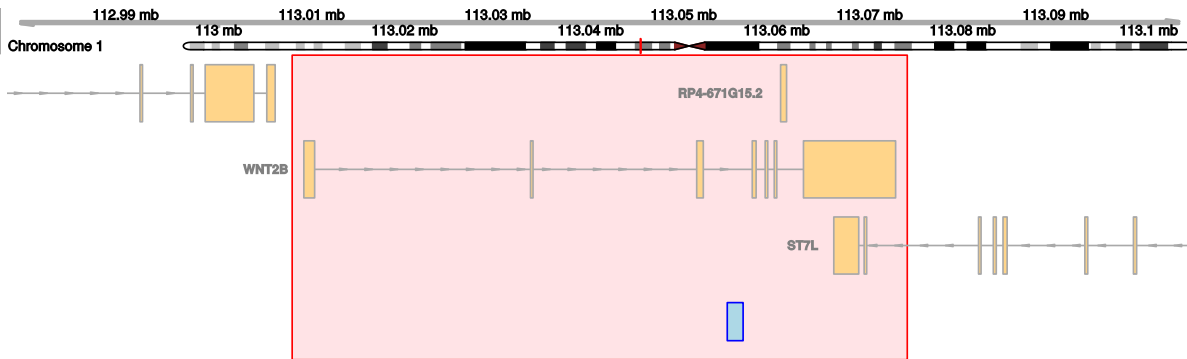

Group ● Non\_CD ● NINF ● INF ● STEN

## Methylation

chr1:113054687-113056390

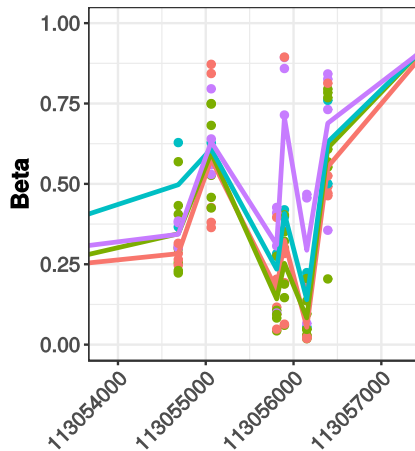

## Expression

WNT2B (ENSG00000134245)

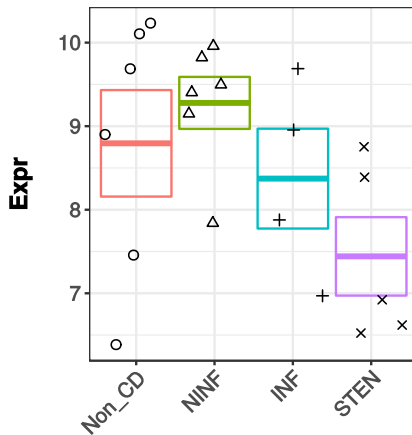

## Correlation

$r = -0.88 [-0.97, -0.39]$ ;  $p\text{-value} = 0.0583$

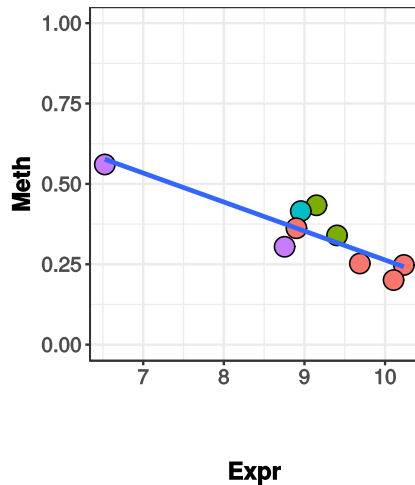

# (B) SERPINF1

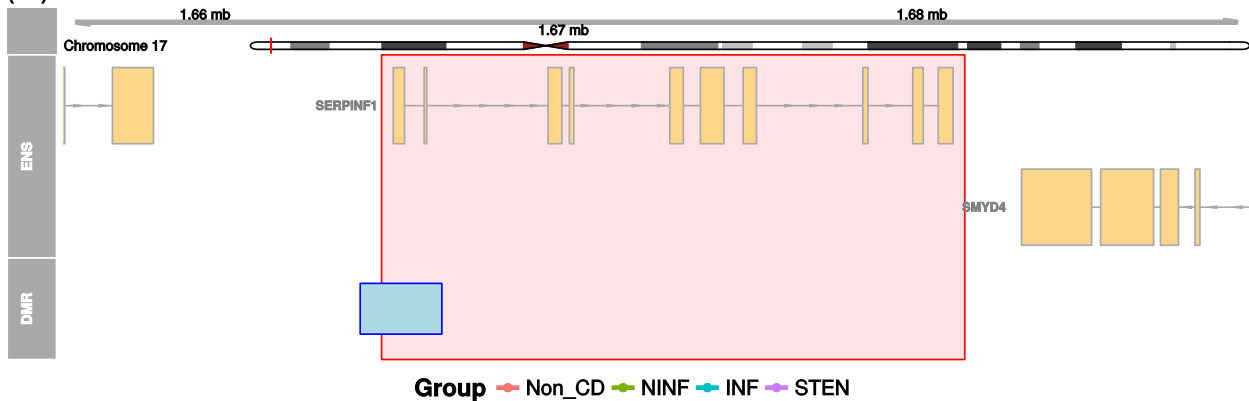

## Methylation

chr17:1664329-1666607

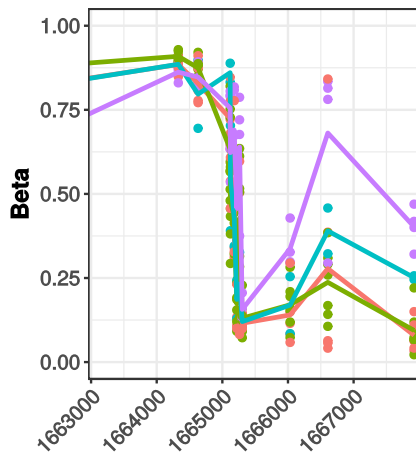

## Expression

SERPINF1 (ENSG00000132386)

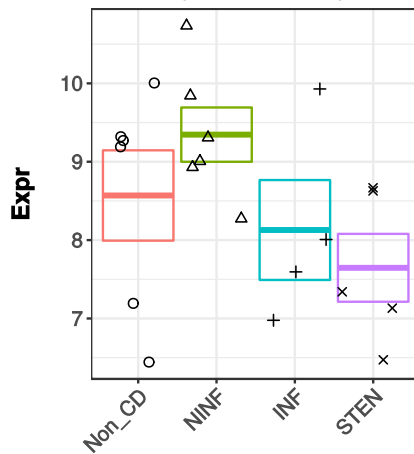

## Correlation

$r = -0.88 [-0.99, -0.43]$ ;  $p\text{-value} = 0.0504$

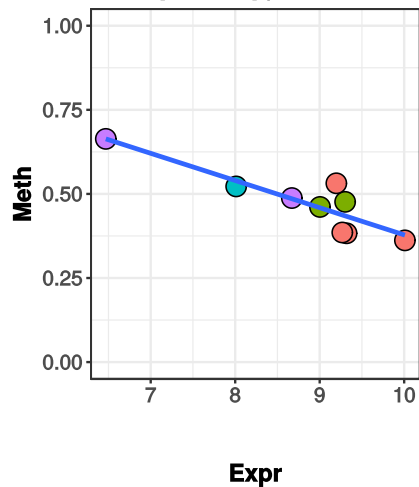

# (C) MBP

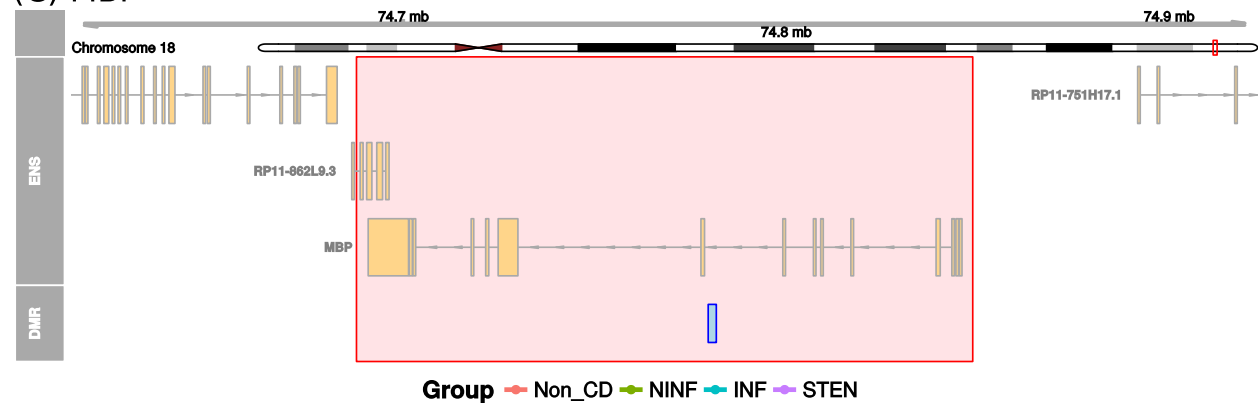

Group — Non\_CD — NINF — INF — STEN

## Methylation

chr18:74779597-74781719

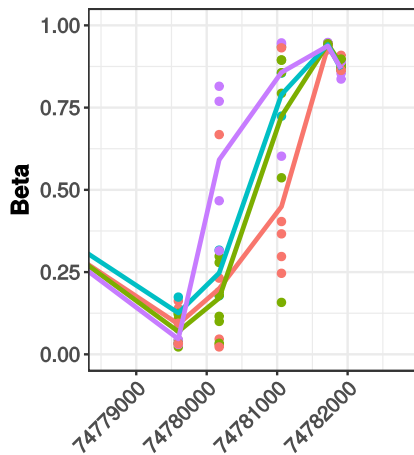

## Expression

MBP (ENSG00000197971)

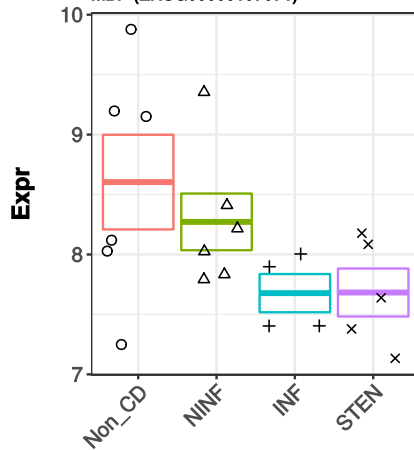

## Correlation

$r = -0.86 [-0.95, -0.4]$ ; p-value = 0.0619

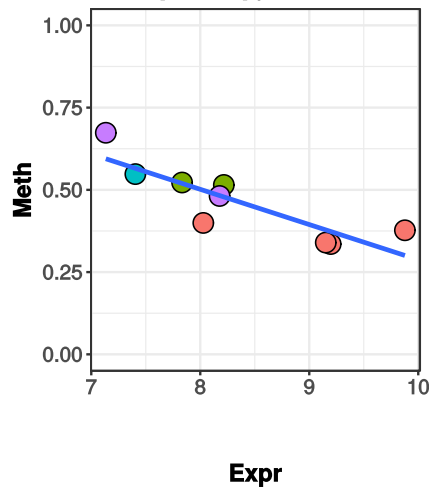

# (D) FGFR4

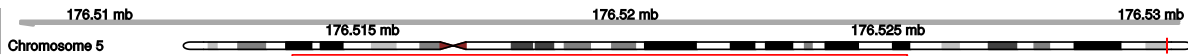

ENS

DMR

Group —●— Non\_CD —●— NINF —●— INF —●— STEN

## Methylation

chr5:176515533-176516968

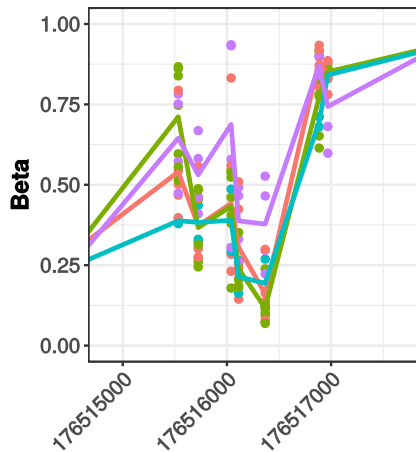

## Expression

FGFR4 (ENSG00000160867)

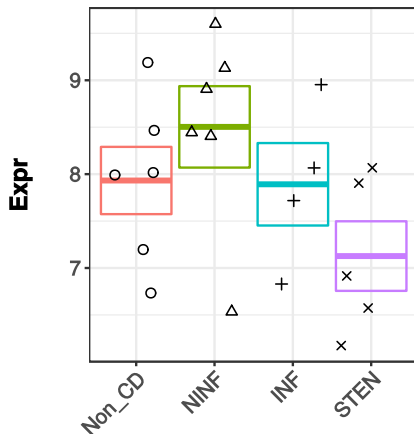

## Correlation

$r = -0.61$  [-0.95, 0.35];  $p\text{-value} = 0.2519$

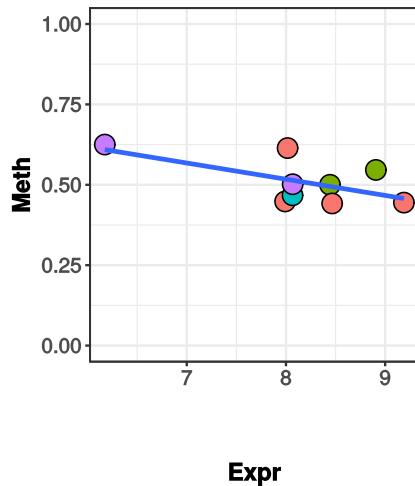

# (E) APOE

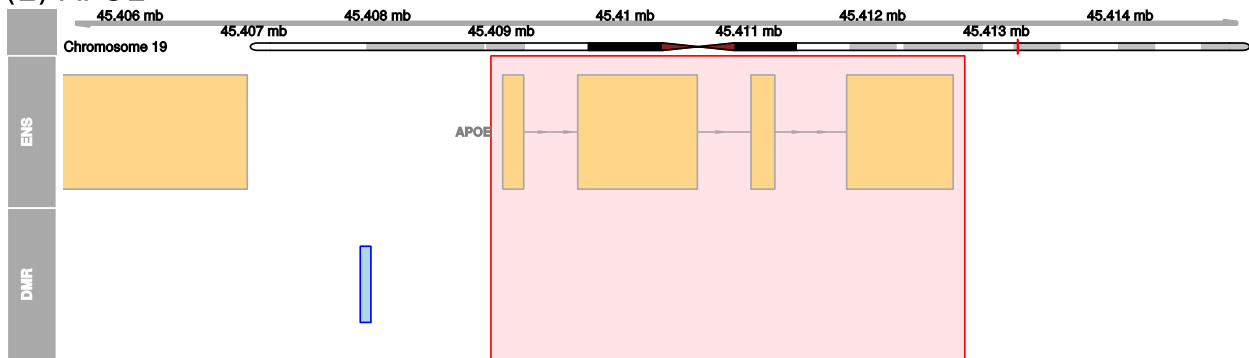

Group — Non\_CD — NINF — INF — STEN

## Methylation

chr19:45407860-45407945

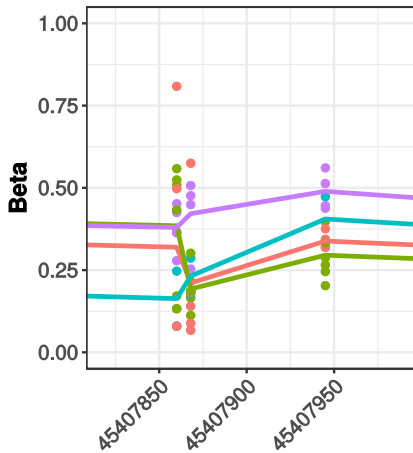

## Expression

APOE (ENSG00000130203)

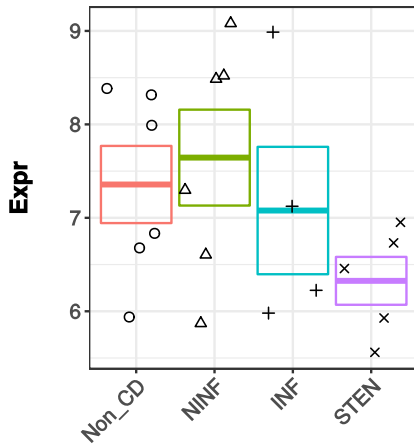

## Correlation

$r = -0.78 [-0.96, -0.1]$ ; p-value = 0.0473

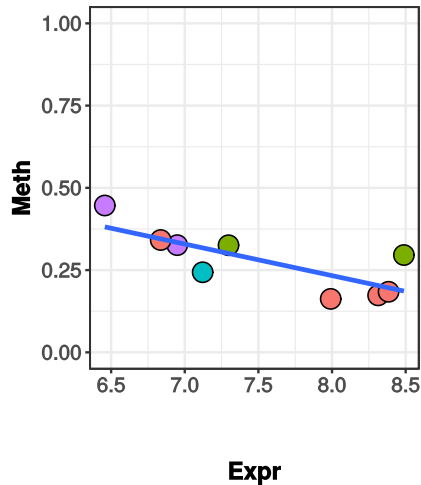

# (F) ACVRL1

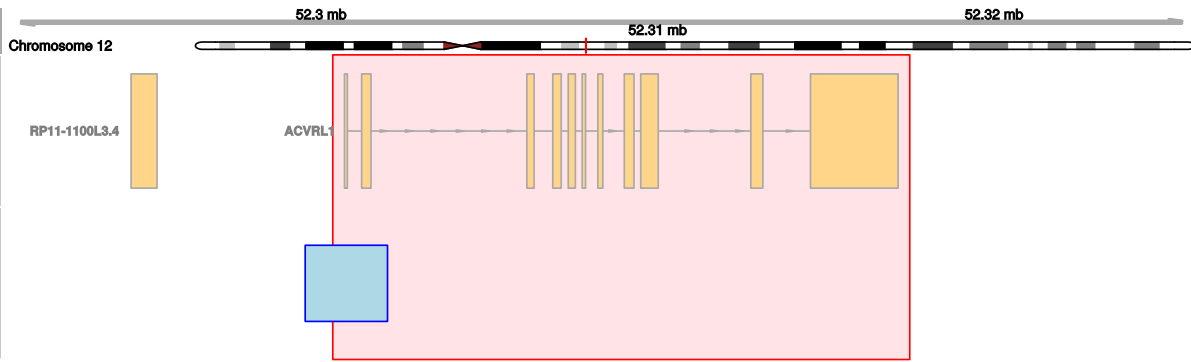

Group —●— Non\_CD —●— NINF —●— INF —●— STEN

## Methylation

chr12:52299524-52301970

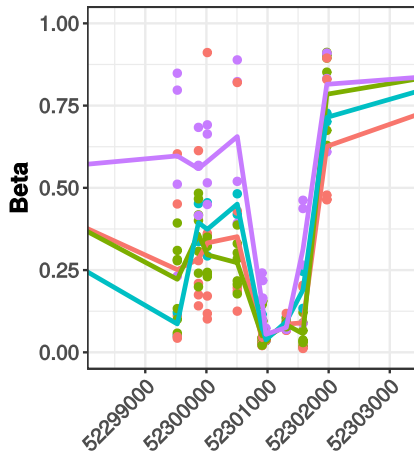

## Expression

ACVRL1 (ENSG00000139567)

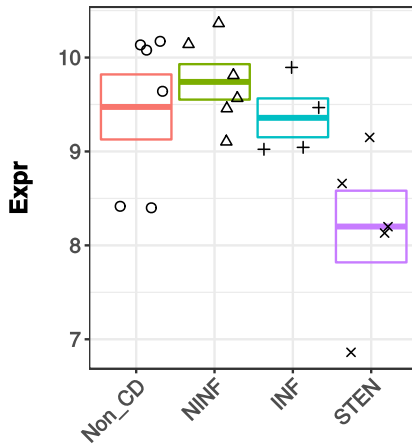

## Correlation

$r = -0.92 [-0.99, -0.63]$ ;  $p\text{-value} = 0.0377$

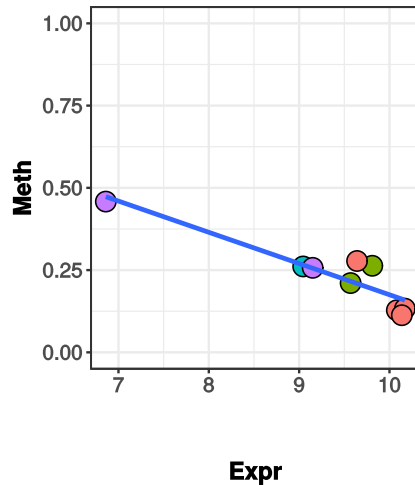

# (G) FGFR1

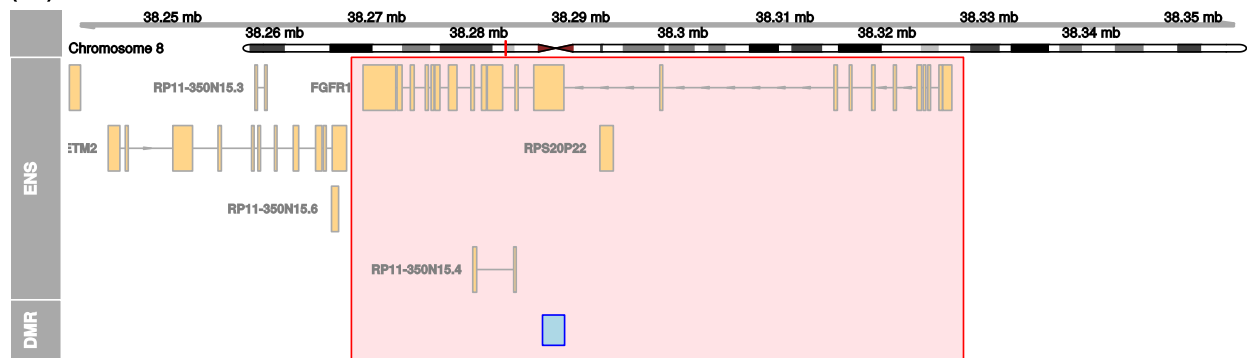

Group — Non\_CD — NINF — INF — STEN

## Methylation

chr8:38286241-38288404

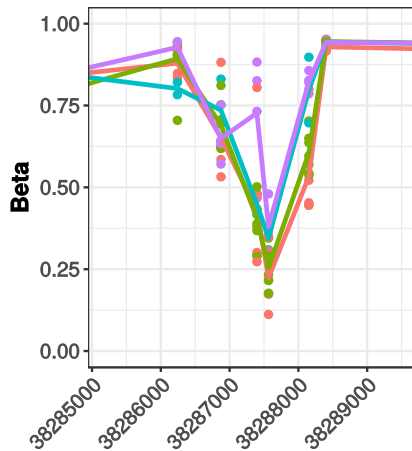

## Expression

FGFR1 (ENSG00000077782)

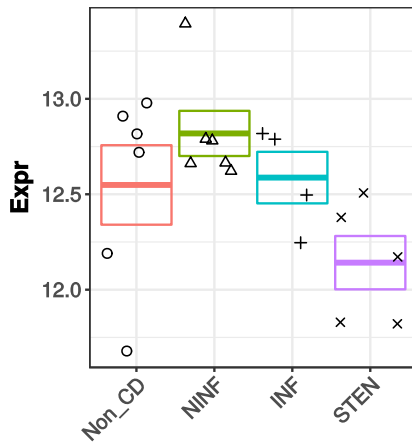

## Correlation

$r = -0.85 [-0.96, -0.37]$ ; p-value = 0.058

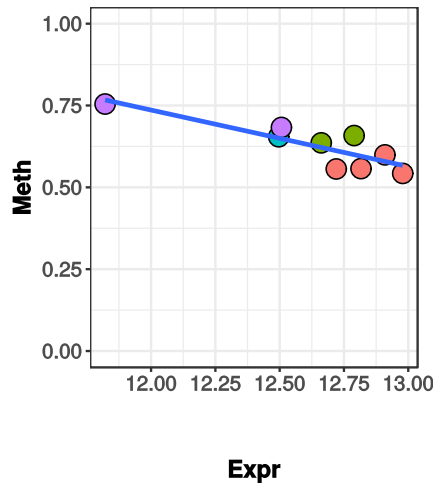

# (H) ZFP36L1

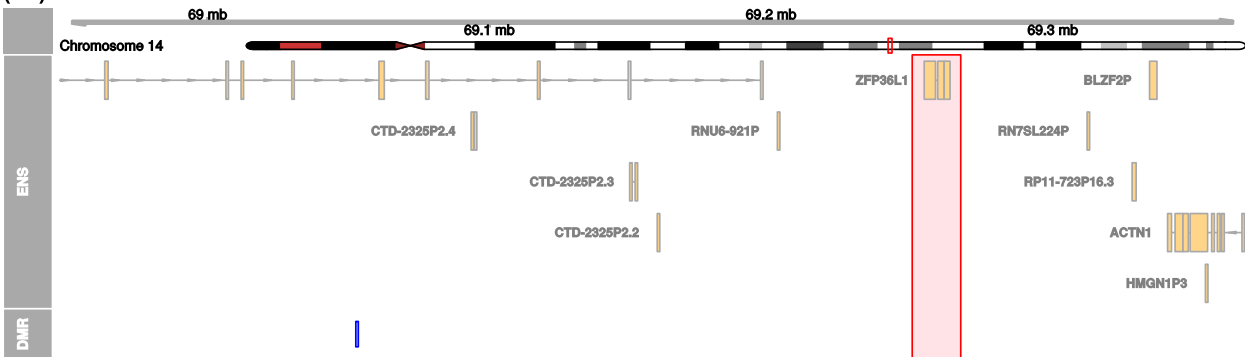

Group —●— Non\_CD —●— NINF —●— INF —●— STEN

## Methylation

chr14:69052728-69053361

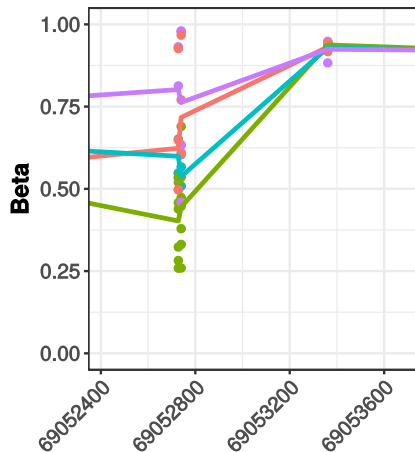

## Expression

ZFP36L1 (ENSG00000185650)

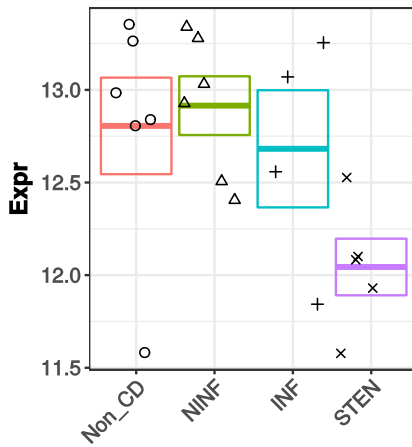

## Correlation

$r = -0.18$  [-0.91, 0.65]; p-value = 0.7015

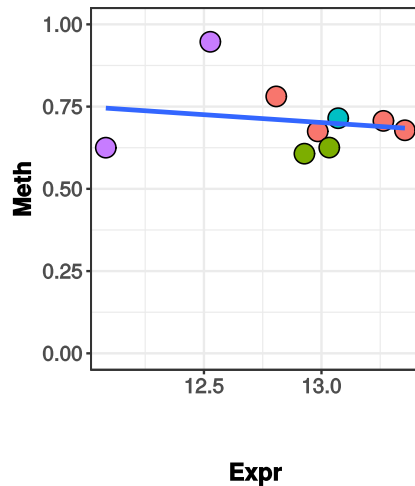



# (I) E2F7

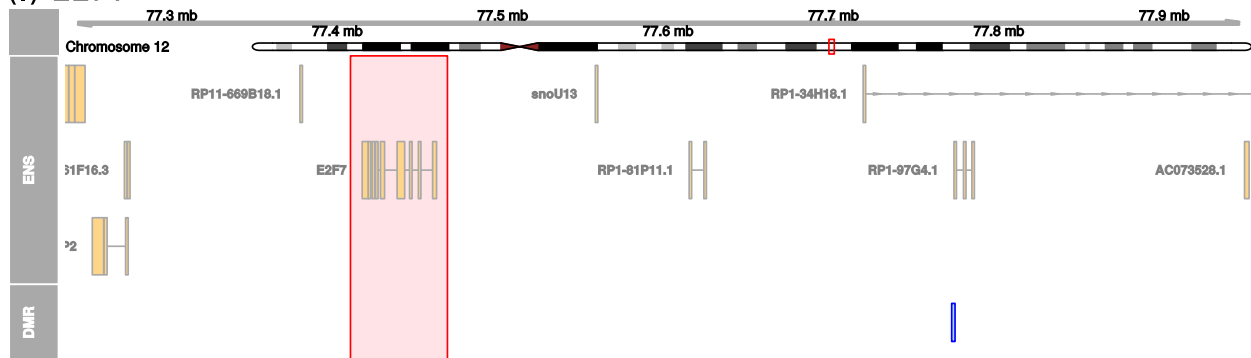

Group — Non\_CD — NINF — INF — STEN

## Methylation

chr12:77771462-77773503

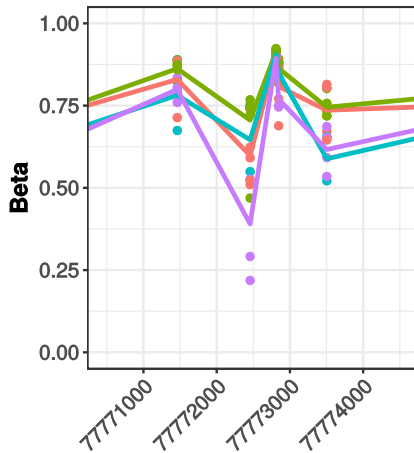

## Expression

E2F7 (ENSG00000165891)

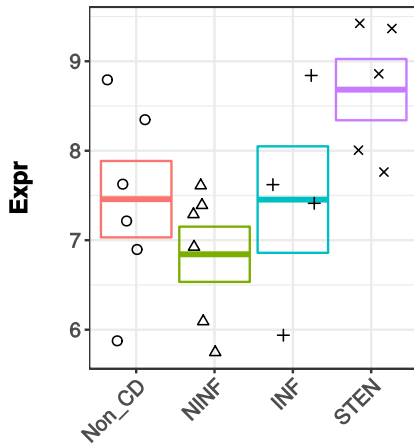

## Correlation

$r = -0.8 [-0.92, -0.29]$ ;  $p\text{-value} = 0.0686$

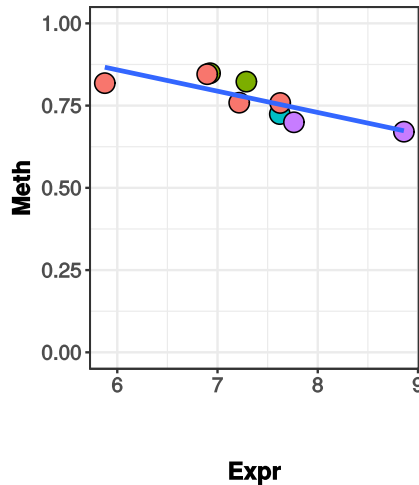

Supplement: pone.0209656.s004.pdf [file pone.0209656.s004.pdf]
