# Supplementary material for: A distinct epigenetic profile distinguishes stenotic from non-inflamed fibroblasts in the ileal mucosa of Crohn’s disease patients
Source: PubMed Central journal article supplement (PMC6307755; doi:10.1371/journal.pone.0209656), 2018-12-27

Figure S2

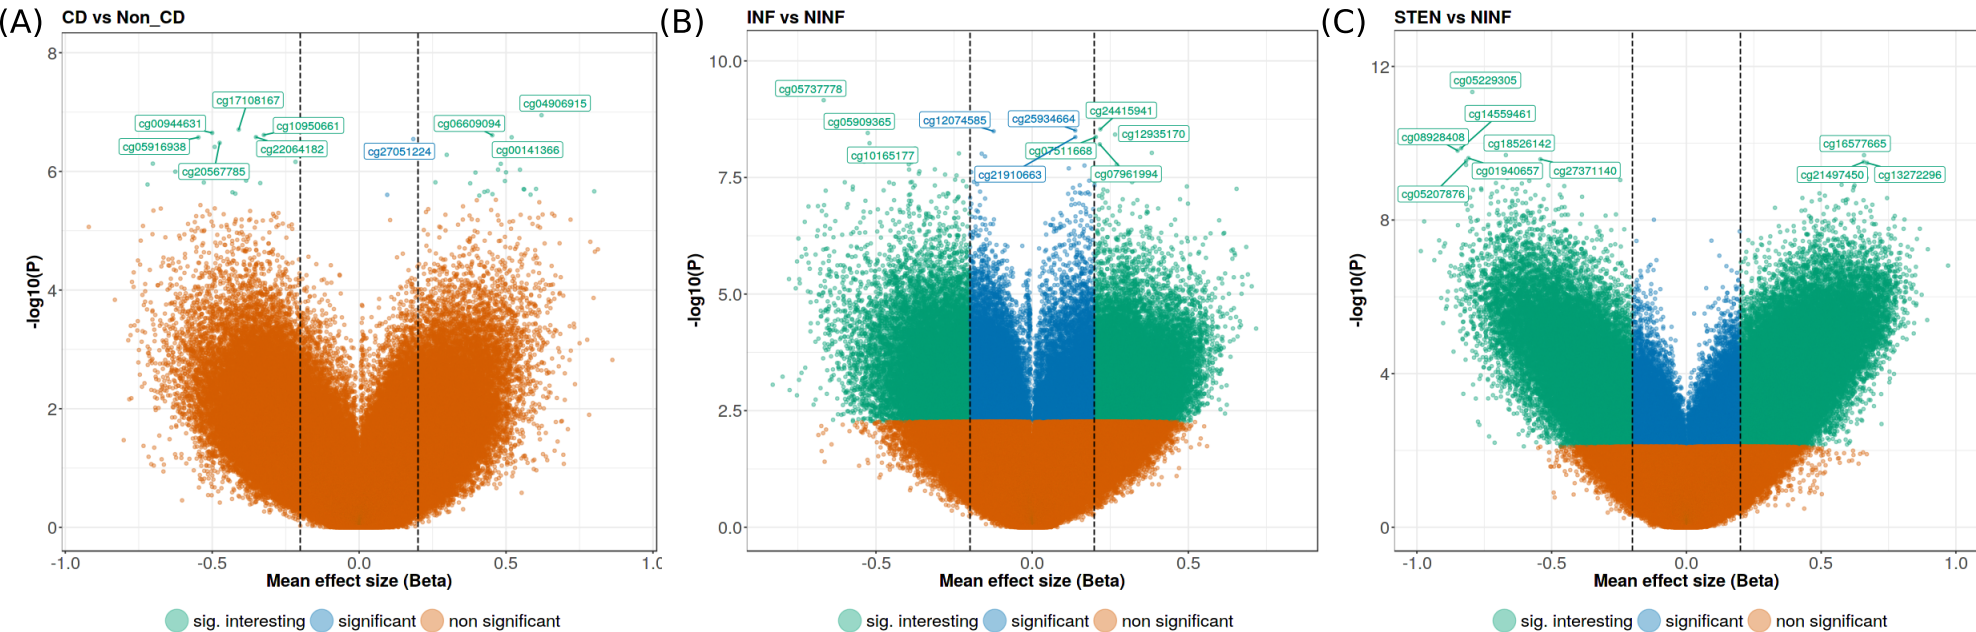

Supplement: pone.0209656.s002.pdf [file pone.0209656.s002.pdf]
